# Supplementary material
Source: HighWire-hosted journal article supplement (https://gh.bmj.com/content/6/8/e006713)
Supplement: inline-supplementary-material-1 [file inline-supplementary-material-1.pdf]

*Gibraltar, 3<sup>o</sup> March 1824.*

**NIGHT.**

PERMIT TO PASS

No. *906*

*Mr. Andrew Patterson & Family*

To continue until  
*further orders.*

*J. Hall*  
Town-Major.
